# Supplementary material
Source: publisher figshare collection journal article supplement (https://tandf.figshare.com/articles/dataset/_/6161177)
Supplement: Supplementary file 1 [file 1]

# Supplement to “Peaks over thresholds modelling with multivariate generalized Pareto distributions”

Anna Kiriliouk

Erasmus University Rotterdam  
Erasmus School of Economics  
3000 DR Rotterdam, the Netherlands.  
E-mail: kiriliouk@ese.eur.nl

Johan Segers

Université catholique de Louvain  
Institut de Statistique, Biostatistique  
et Sciences Actuarielles  
Voie du Roman Pays 20  
1348 Louvain-la-Neuve, Belgium.  
E-mail: johan.segers@uclouvain.be

Holger Rootzén

Chalmers University of Technology  
Department of Mathematical Sciences  
SE-412 96 Gothenburg, Sweden.  
E-mail: hrootzen@chalmers.se

Jennifer L. Wadsworth

Lancaster University  
Department of Mathematics and Statistics  
Fylde College LA1 4YF, Lancaster, England.  
E-mail: j.wadsworth@lancaster.ac.uk

## A Censored likelihoods

Here we detail forms of censored likelihoods for the models proposed in Section 7. For simplicity they are presented in standardized ( $\boldsymbol{\sigma} = \mathbf{1}$ ,  $\boldsymbol{\gamma} = \mathbf{0}$ ) form, i.e.,

$$h^C(\mathbf{x}_{D \setminus C}, \mathbf{v}_C; \mathbf{1}, \mathbf{0}) = \int_{\times_{j \in C} (-\infty, v_j]} h(\mathbf{x}; \mathbf{1}, \mathbf{0}) d\mathbf{x}_C, \quad (\text{A.1})$$

for  $v_j \leq 0$  and  $h$  corresponding to either  $h_{\mathbf{T}}$  or  $h_{\mathbf{U}}$ . The generalized form of a censored likelihood is easily obtained from (A.1) as

$$h^C(\mathbf{x}_{D \setminus C}, \mathbf{v}_C; \boldsymbol{\sigma}, \boldsymbol{\gamma}) = h^C\left(\frac{1}{\gamma_{D \setminus C}} \log(1 + \gamma_{D \setminus C} \mathbf{x}_{D \setminus C} / \boldsymbol{\sigma}_{D \setminus C}), \frac{1}{\gamma_C} \log(1 + \gamma_C \mathbf{v}_C / \boldsymbol{\sigma}_C); \mathbf{1}, \mathbf{0}\right)$$

$$\times \prod_{j \in D \setminus C} \frac{1}{\sigma_j + \gamma_j x_j}.$$

The support for each density is  $\{\mathbf{x} \in \mathbb{R}^d : \mathbf{x} \not\leq \mathbf{0}\}$ , and we let  $|C|$  denote the cardinality of the set  $C$ .

### Generators with independent Gumbel components

Case  $f_T = f_V$ .

$$\begin{aligned} h^C(\mathbf{x}_{D \setminus C}, \mathbf{v}_C; \mathbf{1}, \mathbf{0}) &= e^{-\max(\mathbf{x})} \\ &\times \int_0^\infty t^{-1} \prod_{j \in C} e^{-(te^{v_j - \beta_j})^{-\alpha_j}} \prod_{j \in D \setminus C} \alpha_j (te^{x_j - \beta_j})^{-\alpha_j} e^{-(te^{x_j - \beta_j})^{-\alpha_j}} dt. \end{aligned}$$

If all  $\alpha_j$  are equal to  $\alpha$ :

$$h^C(\mathbf{x}_{D \setminus C}, \mathbf{v}_C; \mathbf{1}, \mathbf{0}) = e^{-\max(\mathbf{x})} \frac{\alpha^{d-|C|-1} \Gamma(d-|C|) \prod_{j \in D \setminus C} e^{-\alpha(x_j - \beta_j)}}{\left( \sum_{j \in C} e^{-\alpha(v_j - \beta_j)} + \sum_{j \in D \setminus C} e^{-\alpha(x_j - \beta_j)} \right)^{d-|C|}}.$$

Case  $f_U = f_V$ .

$$h^C(\mathbf{x}_{D \setminus C}, \mathbf{v}_C; \mathbf{1}, \mathbf{0}) = \frac{\int_0^\infty \prod_{j \in C} e^{-(te^{v_j - \beta_j})^{-\alpha_j}} \prod_{j \in D \setminus C} \alpha_j (te^{x_j - \beta_j})^{-\alpha_j} e^{-(te^{x_j - \beta_j})^{-\alpha_j}} dt}{\int_0^\infty \left( 1 - \prod_{j=1}^d e^{-(t/e^{\beta_j})^{-\alpha_j}} \right) dt}.$$

If all  $\alpha_j$  are equal to  $\alpha$ :

$$h^C(\mathbf{x}_{D \setminus C}, \mathbf{v}_C; \mathbf{1}, \mathbf{0}) = \frac{\alpha^{d-|C|-1} \Gamma(d-|C|-1/\alpha) \left( \sum_{j=1}^d e^{\beta_j \alpha} \right)^{-1/\alpha} \prod_{j \in D \setminus C} e^{-\alpha(x_j - \beta_j)}}{\Gamma(1-1/\alpha) \left( \sum_{j \in C} e^{-\alpha(v_j - \beta_j)} + \sum_{j \in D \setminus C} e^{-\alpha(x_j - \beta_j)} \right)^{d-|C|-1/\alpha}}.$$

### Generators with independent reverse exponential components

Case  $f_T = f_V$ .

$$h^C(\mathbf{x}_{D \setminus C}, \mathbf{v}_C; \mathbf{1}, \mathbf{0}) = e^{-\max(\mathbf{x})} \times$$

$$\int_0^{e^{-\max_{j \in D \setminus C}(x_j + \beta_j)}} t^{-1} \prod_{j \in C} \min(te^{v_j + \beta_j}, 1)^{\alpha_j} \prod_{j \in D \setminus C} \alpha_j (te^{x_j + \beta_j})^{\alpha_j} dt \quad (\text{A.2})$$

To evaluate this, consider two cases: (i)  $\max_{j \in C}(v_j + \beta_j) < \max_{j \in D \setminus C}(x_j + \beta_j)$ ; and (ii) let  $v_{(1)} + \beta_{(1)} > \dots > v_{(k)} + \beta_{(k)} > \max_{j \in D \setminus C}(x_j + \beta_j) > v_{(k+1)} + \beta_{(k+1)} > \dots$  for  $j \in C$  and  $k \leq |C|$ . In case (i), we have

$$h^C(\mathbf{x}_{D \setminus C}, \mathbf{v}_C; \mathbf{1}, \mathbf{0}) = e^{-\max(\mathbf{x})} \frac{\prod_{j \in C} e^{\alpha_j(v_j + \beta_j)} \prod_{j \in D \setminus C} \alpha_j e^{\alpha_j(\beta_j + x_j)}}{\left(\sum_{j=1}^d \alpha_j\right) (e^{\max_{j \in D \setminus C}(x_j + \beta_j)})^{\sum_{j=1}^d \alpha_j}},$$

since on the range  $t \in (0, e^{-\max_{j \in D \setminus C}(x_j + \beta_j)})$  the term  $\prod_{j \in C} \min(te^{v_j + \beta_j}, 1)^{\alpha_j}$  in (A.2) is equal to  $\prod_{j \in C} (te^{v_j + \beta_j})^{\alpha_j}$ . In case (ii) this term will vary over that range, and one needs to split the integral as follows:

$$\int_0^{e^{-(v_{(1)} + \beta_{(1)})}} + \int_{e^{-(v_{(1)} + \beta_{(1)})}}^{e^{-(v_{(2)} + \beta_{(2)})}} + \dots + \int_{e^{-(v_{(k)} + \beta_{(k)})}}^{e^{-\max_{j \in D \setminus C}(x_j + \beta_j)}}.$$

An evaluation of each integral yields that  $e^{\max(\mathbf{x})} h^C(\mathbf{x}_{D \setminus C}, \mathbf{v}_C; \mathbf{1}, \mathbf{0})$  is equal to

$$\begin{aligned} & \frac{\prod_{j \in C} e^{\alpha_j(v_j + \beta_j)} \prod_{j \in D \setminus C} \alpha_j e^{\alpha_j(x_j + \beta_j)}}{\left(\sum_{j=1}^d \alpha_j\right) (e^{v_{(1)} + \beta_{(1)}})^{\sum_{j=1}^d \alpha_j}} \\ & + \sum_{i=1}^{k-1} \left\{ \frac{\prod_{j \in C_{(i)}} e^{\alpha_j(v_j + \beta_j)} \prod_{j \in D \setminus C} \alpha_j e^{\alpha_j(x_j + \beta_j)/\alpha_j}}{\sum_{j \in C_{(i)}} \alpha_j + \sum_{j \in D \setminus C} \alpha_j} \right. \\ & \quad \times \left[ (e^{v_{(i+1)} + \beta_{(i+1)}})^{-\sum_{j \in C_{(i)}} \alpha_j - \sum_{j \in D \setminus C} \alpha_j} - (e^{v_{(i)} + \beta_{(i)}})^{-\sum_{j \in C_{(i)}} \alpha_j - \sum_{j \in D \setminus C} \alpha_j} \right] \Big\} \\ & + \frac{\prod_{j \in C_{(k)}} e^{\alpha_j(v_j + \beta_j)} \prod_{j \in D \setminus C} \alpha_j e^{\alpha_j(x_j + \beta_j)}}{\sum_{j \in C_{(k)}} \alpha_j + \sum_{j \in D \setminus C} \alpha_j} \\ & \quad \times \left[ (e^{\max_{j \in D \setminus C}(x_j + \beta_j)})^{-\sum_{j \in C_{(k)}} \alpha_j - \sum_{j \in D \setminus C} \alpha_j} - (e^{v_{(k)} + \beta_{(k)}})^{-\sum_{j \in C_{(k)}} \alpha_j - \sum_{j \in D \setminus C} \alpha_j} \right] \end{aligned}$$

with  $C_{(i)} = C \setminus \{(1), \dots, (i)\}$ , i.e., with the indices corresponding to the  $i$  largest  $v_j + \beta_j$  removed.

**Case  $f_U = f_V$ .** Is found similarly by noting the relation between these two approaches.

### Generators with independent log-gamma components

**Case  $f_T = f_V$ .** Let  $F_j$  denote the cumulative distribution function of a  $\text{Gamma}(\alpha_j, 1)$  random variable. Then

$$h^C(\mathbf{x}_{D \setminus C}, \mathbf{v}_C; \mathbf{1}, \mathbf{0}) = e^{-\max(\mathbf{x})} \prod_{j \in D \setminus C} \frac{e^{\alpha_j x_j}}{\Gamma(\alpha_j)} \int_0^\infty t^{-1} \left( \prod_{j \in D \setminus C} t^{\alpha_j} e^{-te^{x_j}} \right) \left( \prod_{j \in C} F_j(te^{v_j}) \right) dt.$$

**Case  $f_U = f_V$ .** Defining  $C_d = \int_{\Delta_{d-1}} \max(u_1, \dots, u_d) \prod_{j=1}^d u_j^{\alpha_j-1} du_1 \cdots du_{d-1}$ , we have

$$\begin{aligned} h^C(\mathbf{x}_{D \setminus C}, \mathbf{v}_C; \mathbf{1}, \mathbf{0}) &= \frac{C_d^{-1}}{\Gamma\left(\sum_{j=1}^d \alpha_j + 1\right)} \prod_{j \in D \setminus C} e^{\alpha_j x_j} \prod_{j \in C} \Gamma(\alpha_j) \\ &\quad \times \int_0^\infty \left( \prod_{j \in D \setminus C} t^{\alpha_j} e^{-te^{x_j}} \right) \left( \prod_{j \in C} F_j(te^{v_j}) \right) dt. \end{aligned}$$

### Generators with multivariate Gaussian components

**Case  $f_T = f_V$ .** For the Gaussian model, using abbreviated notation, the key observation is

$$\int_{\times_{j \in C} (-\infty, v_j]} h(\mathbf{x}) d\mathbf{x}_C = h_{D \setminus C}(\mathbf{x}_{D \setminus C}) \int_{\times_{j \in C} (-\infty, v_j]} \frac{h(\mathbf{x})}{h_{D \setminus C}(\mathbf{x}_{D \setminus C})} d\mathbf{x}_C, \quad (\text{A.3})$$

and the ratio in the second integral can be written as a proper Gaussian density function (with parameters that depend on  $\mathbf{x}_{D \setminus C}$ ). The integrand is

$$\begin{aligned} \frac{h(\mathbf{x})}{h_{D \setminus C}(\mathbf{x}_{D \setminus C})} &= \frac{e^{\max_{j \in D \setminus C} x_j} (\mathbf{1}^T \Sigma_{D \setminus C}^{-1} \mathbf{1})^{1/2}}{e^{\max(\mathbf{x})} (\mathbf{1}^T \Sigma^{-1} \mathbf{1})^{1/2}} \frac{|\Sigma_{D \setminus C}|^{1/2}}{|\Sigma|^{1/2}} \frac{(2\pi)^{(d-|C|-1)/2}}{(2\pi)^{(d-1)/2}} \\ &\quad \times \exp \left\{ -\frac{1}{2} [(\mathbf{x} - \boldsymbol{\beta})^T A (\mathbf{x} - \boldsymbol{\beta}) - (\mathbf{x}_{D \setminus C} - \boldsymbol{\beta}_{D \setminus C})^T A_{D \setminus C} (\mathbf{x}_{D \setminus C} - \boldsymbol{\beta}_{D \setminus C})] \right\} \quad (\text{A.4}) \end{aligned}$$

with

$$A_{D \setminus C} = \Sigma_{D \setminus C}^{-1} - \frac{\Sigma_{D \setminus C}^{-1} \mathbf{1} \mathbf{1}^T \Sigma_{D \setminus C}^{-1}}{\mathbf{1}^T \Sigma_{D \setminus C}^{-1} \mathbf{1}}.$$

Firstly note that

$$e^{\max_{j \in D \setminus C} x_j} = e^{\max(\mathbf{x})}$$

as the maximum will not occur among the censored components. By a completion of the square it can be shown that expression (A.4) is in fact equal to

$$\frac{(2\pi)^{(|C|-d)/2}}{|\Gamma|^{1/2}} \exp \left\{ -\frac{1}{2}(\mathbf{x}_C - \boldsymbol{\mu})^T \Gamma^{-1}(\mathbf{x}_C - \boldsymbol{\mu}) \right\}$$

with

$$\boldsymbol{\mu} = -(K_C^T A K_C)^{-1} K_C A K_{D \setminus C}(\mathbf{x}_{D \setminus C} - \boldsymbol{\beta}_{D \setminus C})$$

and

$$\Gamma = (K_C^T A K_C)^{-1},$$

where  $K_C$  (respectively  $K_{D \setminus C}$ ) is a  $d \times |C|$  [respectively  $d \times (d - |C|)$ ] matrix of 0s with 1s in the  $(C_k, l)^{\text{th}}$  position, for  $C_k$  the  $k$ th index in  $C$  and  $k = 1, \dots, |C|$ ,  $l = 1, \dots, |C|$  (similarly for  $K_{D \setminus C}$ ). Therefore equation (A.3) resolves as

$$h_{D \setminus C}(\mathbf{x}_{D \setminus C}) \Phi_{|C|}(\mathbf{v}_C - \boldsymbol{\beta}_C; \boldsymbol{\mu}, \Gamma)$$

with  $\Phi_{|C|}(\cdot; \boldsymbol{\mu}, \Gamma)$  the cdf of a  $|C|$ -variate multivariate Gaussian distribution with location vector  $\boldsymbol{\mu}$  and covariance matrix  $\Gamma$ .

**Case  $f_U = f_V$ .** Again this can be found similarly to the above noting the relation between these two forms; see also Wadsworth and Tawn (2014).

## Generators with structured components

Recall that since this is a model on the random vector  $\mathbf{R}$ , we need to differentiate between  $\boldsymbol{\gamma} = \mathbf{0}$  and  $\boldsymbol{\gamma} > \mathbf{0}$ . We present the case  $\boldsymbol{\gamma} = \mathbf{0}$  only, since the case  $\boldsymbol{\gamma} > \mathbf{0}$  is very similar. Moreover, we set  $\mathbf{v} = v\mathbf{1}$  as in Section 6.2.

**Case  $\boldsymbol{\gamma} = \mathbf{0}$ .** The censored likelihood has an analytical expression but is tedious to write down. Note that, since the density  $h(\mathbf{x}; \mathbf{1}, \mathbf{0})$  is non-zero only for  $x_1 < \dots < x_d$ , we censor in  $|C| = k$  components if  $x_1 < \dots < x_k < v < x_{k+1} < \dots < x_d$ . If  $k = 1$ , then for  $\mathbb{1}(v < x_2 < \dots < x_d)$  and  $\mathbb{1}(x_d > 0)$ ,

$$h^C(x_{2:d}, v; \mathbf{1}, \mathbf{0}) = \frac{d! \prod_{j=1}^d \lambda_j}{\sum_{j=1}^d \lambda_j^{-1}} \int_{-\infty}^v \frac{\prod_{j=1}^d e^{x_j}}{\left( \sum_{j=1}^d (\lambda_j - \lambda_{j+1}) e^{x_j} \right)^{d+1}} dx_1$$

$$\begin{aligned}
&= \frac{(d-1)! e^{\sum_{j=2}^d x_j} \prod_{j=1}^d \lambda_j}{(\lambda_1 - \lambda_2) \sum_{j=1}^d \lambda_j^{-1}} \left\{ \left( \sum_{j=2}^d (\lambda_j - \lambda_{j+1}) e^{x_j} \right)^{-d} \right. \\
&\quad \left. - \left( (\lambda_1 - \lambda_2) e^v + \sum_{j=2}^d (\lambda_j - \lambda_{j+1}) e^{x_j} \right)^{-d} \right\},
\end{aligned}$$

where  $x_{2:d} = (x_2, \dots, x_d)$ . Expressions for  $k > 1$  follow naturally by repeated integration of the above result.

## B Bivariate tail dependence coefficients

We present analytical expressions for the bivariate tail dependence coefficient  $\chi = \chi_{1:2}$ , where available in closed form, for the models detailed in the paper.

### Generators with independent Gumbel components

**Case  $f_T = f_V$ .** If  $\alpha_1 = \alpha_2 = \alpha > 0$  and  $\beta_1 = \beta_2$ , then

$$\chi = 2 - \frac{1}{\int_0^1 (1 + u^\alpha)^{-1} du}.$$

**Case  $f_U = f_V$ .** If  $\alpha_1 = \alpha_2 = \alpha \geq 1$ , then

$$\chi = 2 - 2^{1/\alpha}.$$

### Generators with independent reverse Gumbel components

**Case  $f_T = f_V$ .** If  $\alpha_1 = \alpha_2 = \alpha > 0$  and  $\beta_1 = \beta_2$ , then

$$\chi = 2 - \frac{1}{\int_0^1 (1 + u^\alpha)^{-1} du}.$$

This expression is the same as for the corresponding independent Gumbel model.

**Case  $f_U = f_V$ .** If  $\alpha_1 = \alpha_2 = \alpha > 0$ , then

$$\chi = 2^{-1/\alpha}.$$

### Generators with independent reverse exponential components

**Case  $f_T = f_V$ .** If  $\alpha_1 = \alpha_2 = \alpha > 0$  and  $\beta_1 = \beta_2$ , then

$$\chi = 1 - \frac{1}{1 + 2\alpha}.$$

For general parameters  $\alpha_1 > 0$  and  $\alpha_2 > 0$ ,

$$\chi = 1 - \left( \frac{1 + \alpha_{(1)}^{-1}}{1 + \alpha_{(2)}^{-1}} \right)^{1 + \alpha_{(2)}} \frac{\alpha_{(1)}}{\alpha_{(2)}} \frac{1}{1 + \alpha_1 + \alpha_2},$$

where  $\alpha_{(1)} = \max(\alpha_1, \alpha_2)$  and  $\alpha_{(2)} = \min(\alpha_1, \alpha_2)$ .

**Case  $f_U = f_V$ .** The expressions for  $\chi$  are the same as the ones given in the case  $f_T = f_V$ .

Figure 1 displays the value of  $\chi$  for a common value of  $\alpha$  in the preceding examples.

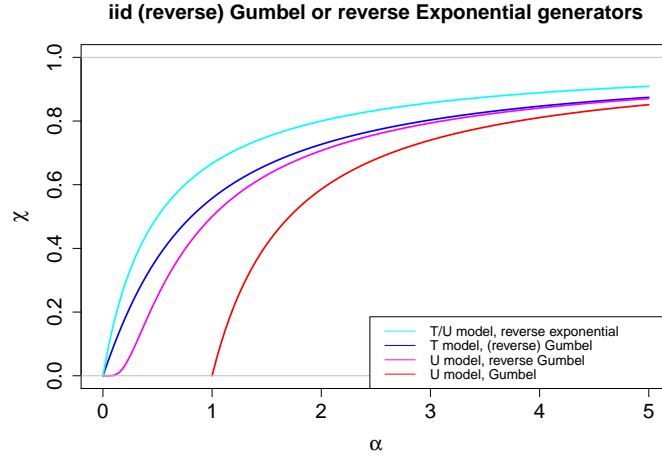

Figure 1:  $\chi$  as a function of common dependence parameter  $\alpha_1 = \alpha_2 = \alpha$  in the independent Gumbel, reverse Gumbel and reverse exponential examples.

### Generators with independent log-gamma components

No closed form expression has been found in this case.

### Generators with multivariate Gaussian components

**Case  $f_T = f_V$ .** Assume  $(T_1, T_2)$  is bivariate Gaussian with means  $\beta_1, \beta_2$ , variances  $\sigma_1^2, \sigma_2^2$ , and correlation  $\rho$ . Let  $S = T_2 - T_1 \sim \mathcal{N}(\Delta, \tau^2)$  with

$$\begin{aligned}\tau^2 &= \text{var}(S) = \sigma_1^2 - 2\rho\sigma_1\sigma_2 + \sigma_2^2, \\ \Delta &= E(S) = \beta_2 - \beta_1 \geq 0.\end{aligned}$$

If  $\beta_1 = \beta_2$ , i.e.,  $\Delta = 0$ ,

$$\chi = 2 \left( 1 - \frac{1}{1 + 2e^{\tau^2/2}\Phi(-\tau)} \right).$$



For the general case, without loss of generality assume  $\beta_2 \geq \beta_1$ . Then  $\Delta = \beta_2 - \beta_1 \geq 0$ . We have

$$\begin{aligned}\chi &= (a_-)^{-1} e^{\Delta + \tau^2/2} \Phi(-\tau - \Delta/\tau) \\ &\quad + (a_-)^{-1} (\Phi((- \Delta + \ln(a_-/a_+))/\tau) - \Phi(-\Delta/\tau)) \\ &\quad + (a_+)^{-1} e^{-\Delta + \tau^2/2} \Phi(-\tau - (-\Delta + \ln(a_-/a_+))/\tau),\end{aligned}$$

where  $(x)_+ = \max(x, 0)$  and  $(x)_- = (-x)_+ = -\min(x, 0)$  denote the positive and negative parts of a scalar  $x$ , and

$$\begin{aligned}a_+ &= E[e^{-(S)_+}] = \Phi(-\Delta/\tau) + e^{-\Delta + \tau^2/2} \Phi(-\tau + \Delta/\tau), \\ a_- &= E[e^{-(S)_-}] = \Phi(\Delta/\tau) + e^{\Delta + \tau^2/2} \Phi(-\tau - \Delta/\tau).\end{aligned}$$

**Case  $f_U = f_V$ .** Assume  $(U_1, U_2)$  is bivariate Gaussian with means  $(\beta_1, \beta_2)$ , variances  $\sigma_1^2, \sigma_2^2$ , and correlation  $\rho$ . Then

$$\chi = 2\Phi(-\tau/2),$$

with  $\tau^2 = \text{var}(U_1 - U_2) = \sigma_1^2 - 2\rho\sigma_1\sigma_2 + \sigma_2^2$ . Note that

$$2\Phi\left(-\frac{\sigma_1 + \sigma_2}{2}\right) \leq \chi \leq 2\Phi\left(-\frac{|\sigma_1 - \sigma_2|}{2}\right).$$

Suppose  $\sigma_1 = \sigma_2 = 1$ ; then  $\tau^2 = 2(1 - \rho)$ , and thus

$$\chi = 2\Phi\left(-\sqrt{(1 - \rho)/2}\right).$$

Figures 2 and 3 display the variation of  $\chi$  with  $\tau$ , as well as  $\rho$  for fixed unit variance.

### Structured components model

These expressions are presented in Section F.2.

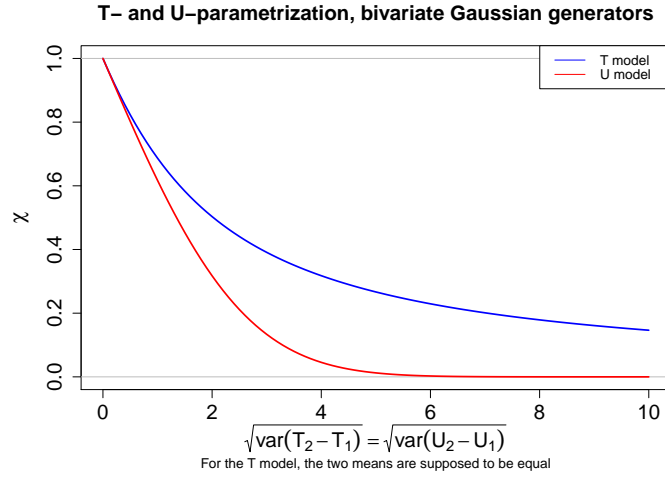

Figure 2:  $\chi$  as a function of  $\tau$  in the model with bivariate Gaussian components. In case  $f_{\mathbf{T}} = f_{\mathbf{V}}$ , it is supposed that the expectations of  $T_1$  and  $T_2$  are the same.

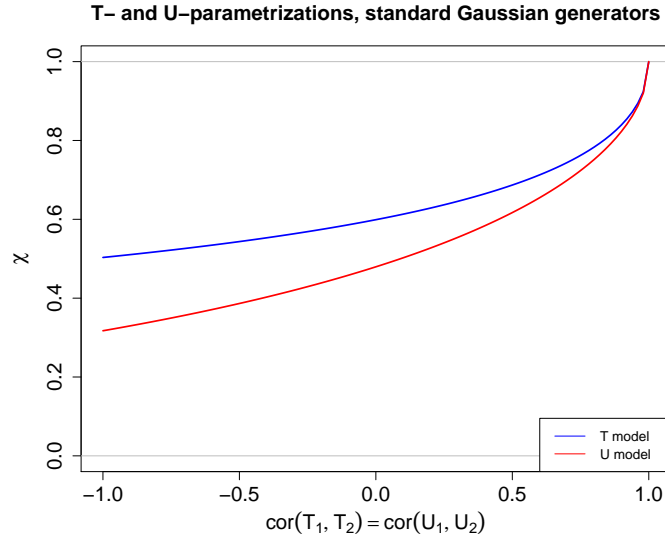

Figure 3:  $\chi$  as a function of  $\rho$  in the model with standard Gaussian components, with common unit standard deviation for  $T_j$  and  $U_j$ .

## C Numerical illustrations of models

To exhibit the performance of censored likelihood estimation we present results of a simulation experiment. For each of the models (7.1), (7.3), and (7.5) in the paper, we generated 200 datapoints from the model and then fitted all three models to the dataset using censored likelihood with  $\mathbf{v} = \mathbf{0}$  in dimension  $d = 3$ . This was repeated 100 times for each model. Figure 4 displays boxplots of  $\hat{\boldsymbol{\theta}} - \boldsymbol{\theta}$ , where the parameters were  $\boldsymbol{\theta} = (\alpha_1, \alpha_2, \alpha_3, \beta_1, \beta_2) = (2, 1, 2, 0, 0)$  for model (7.1),  $\boldsymbol{\theta} = (\alpha_1, \alpha_2, \alpha_3, \beta_1, \beta_2) = (1/2, 1, 1/2, 0, 0)$  for model (7.3), and  $\boldsymbol{\theta} = (\rho_1, \rho_2, \rho_3, \beta_1, \beta_2) = (-0.1, 0.5, 0.7, 0, 0)$  or  $\boldsymbol{\theta} = (\rho_1, \rho_2, \rho_3, \beta_1, \beta_2) = (0.1, 0.5, 0.7, 0, 0)$  for model (7.5), where the multivariate Gaussian vector  $\mathbf{V}$  had covariance matrix

$$\Sigma = \begin{pmatrix} 1 & \rho_1 & \rho_2 \\ \rho_1 & 1 & \rho_3 \\ \rho_2 & \rho_3 & 1 \end{pmatrix}$$

Margins were not estimated. All boxplots are approximately centered around zero indicating unbiased estimation, as should be expected when simulating from and fitting the same model. The quality of estimation was poorest for the model with multivariate Gaussian generator, (7.5), with negative correlation parameter. Estimation appears improved when the correlations are all positive.

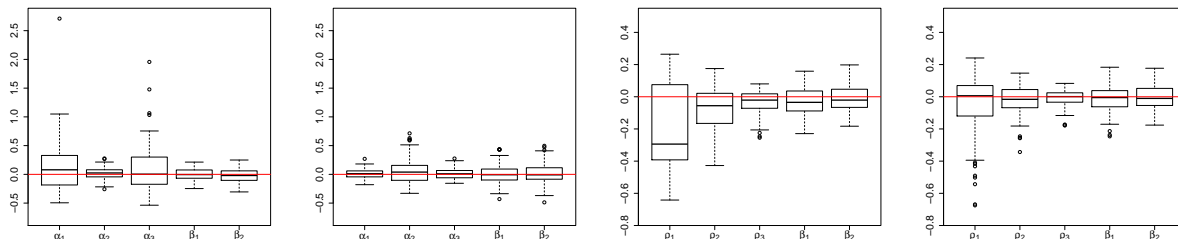

Figure 4: Maximum censored likelihood estimates of parameters, using the correct model, with the true parameter values subtracted. Left-right models (7.1), (7.3), (7.5) ( $\rho_1 = -0.1$ ) and (7.5) ( $\rho_1 = 0.1$ ). Boxplots based on 100 repetitions.

Table 1 displays the proportion of times that the AIC selects the correct model out of the three options. As all models here have five estimated parameters, this is equivalent to the proportion of times that the likelihood was highest for the correct model.

Table 1: Proportion of times AIC picked the correct model

|            | Model (7.1) | Model (7.3) | Model (7.5) ( $\rho_1 = -0.1$ ) | Model (7.5) ( $\rho_1 = 0.1$ ) |
|------------|-------------|-------------|---------------------------------|--------------------------------|
| Proportion | 0.93        | 0.98        | 0.98                            | 0.95                           |

## D Scatterplots and density contours

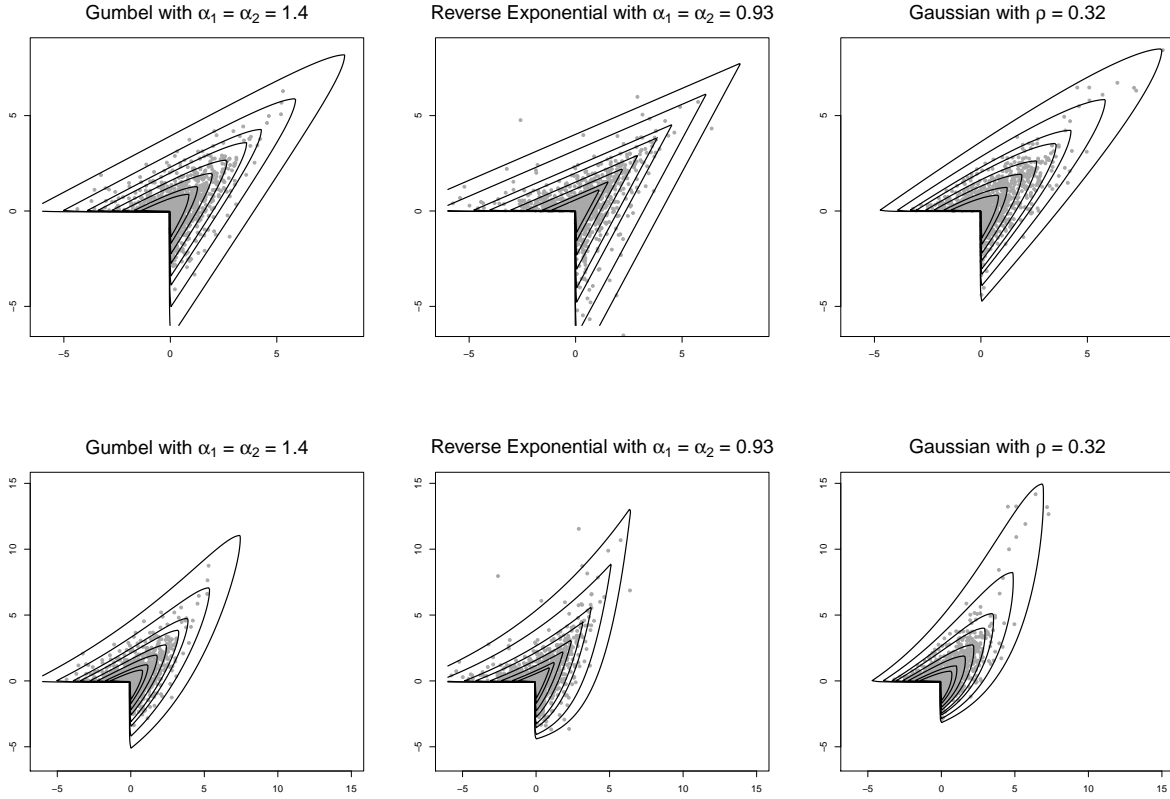

Figure 5: Scatterplots and density contours for the bivariate Gumbel  $h_{\mathbf{T}}$  (left), the reverse exponential  $h_{\mathbf{T}}$  (middle) and the Gaussian  $h_{\mathbf{T}}$  (right) models, where  $\sigma = (1, 1)$  and  $\gamma = (0, 0)$  (top) or  $\gamma = (0, 0.2)$  (bottom) and the dependence parameters are chosen such that  $\chi_{1:2} = 0.65$ .

## E Supporting information for Section 5

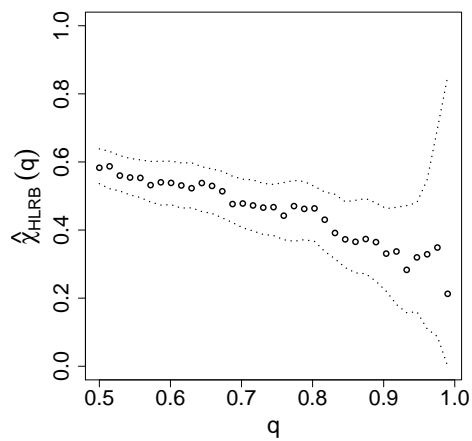

Figure 6: Negative UK bank returns: estimate of  $\chi_{HLRB}(q)$  with HSBC (H), Lloyds (L), RBS (R) and Barclays (B). Approximate 95% pointwise confidence intervals are obtained by bootstrapping from  $\{\mathbf{Y}_t : t = 1, \dots, n\}$ .

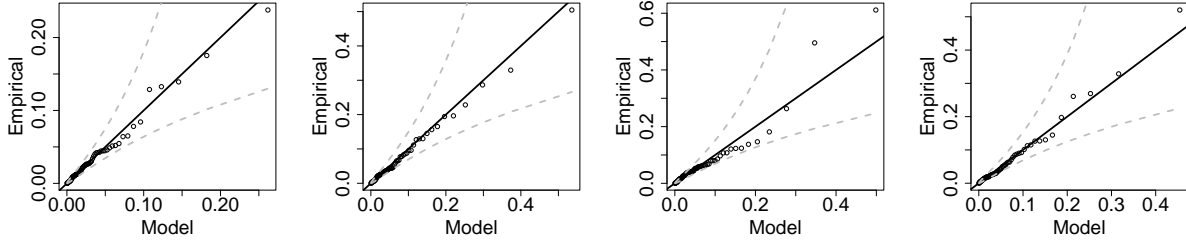

Figure 7: Negative UK bank returns: marginal QQ-plots using the fitted GP distribution. From left to right: HSBC, Lloyds, RBS and Barclays. The 95% pointwise confidence intervals are obtained by a transformation of the beta distributed order statistics of a uniform distribution.

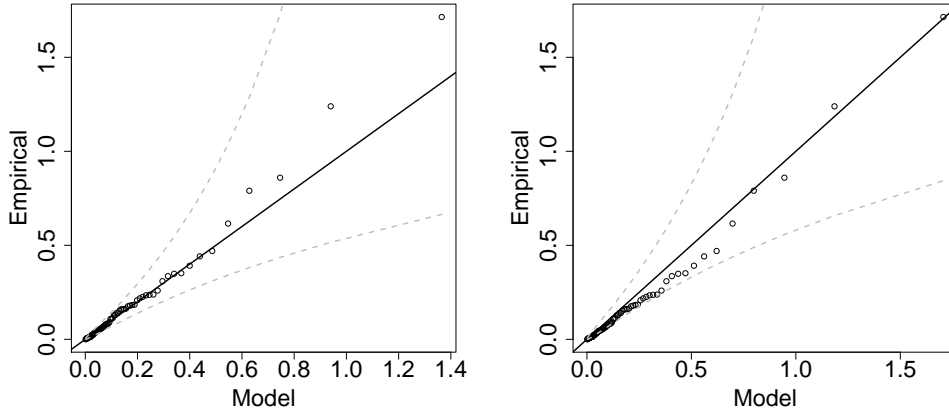

Figure 8: Negative UK bank returns: QQ-plots for GP distribution fitted by maximum likelihood to (6.1) (left) and for GP distribution with scale and shape parameter determined by the multivariate fit and Proposition 5.7 of Rootzén et al. (2018) (right). The 95% pointwise confidence intervals are obtained by a transformation of the beta distributed order statistics of a uniform distribution.

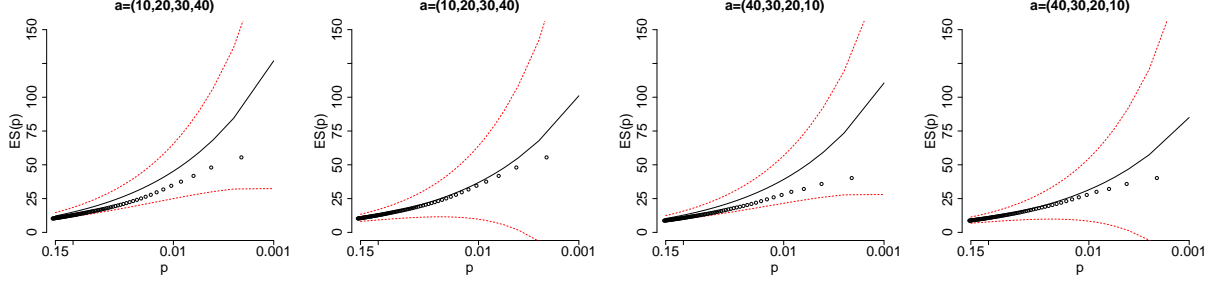

Figure 9: ES estimates and pointwise 95% delta-method confidence intervals for portfolio losses based on the weights given as the figure title. Estimates based on the multivariate GP fit are on the left of a pair; estimates based on the univariate fit are on the right.

## F Supporting information for Section 6

### F.1 Time trend and marginal QQ plots

We investigate the question whether there is a trend in the daily, two-day or three-day rainfall amounts by fitting a univariate GP distribution with a fixed shape parameter  $\gamma$  but a loglinear trend for the scale parameter,  $\log \sigma(t) = a + bt$  for  $t \in (0, 1]$ , to the marginal components of the series  $(\mathbf{Y}_i)_{i=1}^n$ . To this end, we need to select marginal thresholds above which we fit the univariate GP distributions. For the first component, we take  $u_1 = 12$  as found previously; for the second and third components, we take  $u_2 = 13.5$  and  $u_3 = 14$  respectively, based on inspection of parameter stability plots. For the first component, the time  $t$  corresponds to the indices  $i \in \{1, \dots, N\}$  for which  $P_i > u_1$ ; for the second and third component, we use the time corresponding to  $\max(P_i, P_{i+1})$  and  $\max(P_i, P_{i+1}, P_{i+2})$ .

In Table 2, we report the parameter estimates for the univariate GP fit above these thresholds. The final line shows the deviance, i.e.,  $-2$  times the difference in log-likelihood with respect to a model with  $\sigma(t) \equiv \sigma$ . We compare to the 95% quantile of a  $\chi_1^2$  distribution, given by 3.84. Likelihood ratio tests show that the absence of a linear trend in the logarithm of the scale parameter cannot be rejected.

Table 2: Precipitation data in Abisko: estimates of the parameters of marginal GP models with  $\log \sigma(t) = a + bt$  and shape  $\gamma$  for thresholds  $u = 12$ ,  $u = 13.5$  and  $u = 14$  respectively; standard errors in parentheses.

|                | $Y_{i1}$     | $Y_{i2}$     | $Y_{i3}$     |
|----------------|--------------|--------------|--------------|
| $\hat{\gamma}$ | -0.09 (0.06) | -0.05 (0.06) | -0.03 (0.06) |
| $\hat{a}$      | 2.01 (0.12)  | 2.13 (0.11)  | 2.21 (0.11)  |
| $\hat{b}$      | 0.24 (0.21)  | 0.24 (0.19)  | 0.21 (0.17)  |
| deviance       | 1.17         | 1.49         | 1.46         |

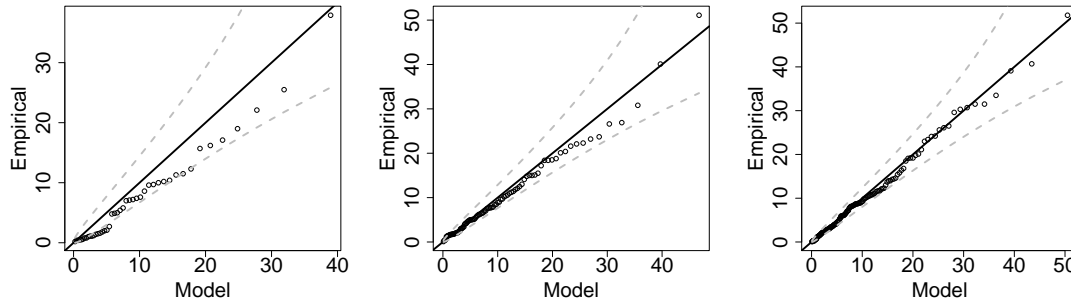

Figure 10: Precipitation data in Abisko: QQ-plots for the univariate GP distributions of the three variables  $Y_{i1}$ ,  $Y_{i2}$  and  $Y_{i3}$  (left to right) for the model with  $\gamma = 0$  with parameters implied by Table 4. The 95% pointwise confidence intervals are obtained by a transformation of the beta distributed order statistics of a uniform distribution.

## F.2 Pairwise and trivariate $\chi$

For the three-dimensional structured components model fitted in Section 6.2, the dependence measures  $\chi_{12}$ ,  $\chi_{13}$ ,  $\chi_{23}$  and  $\chi_{123}$  are

$$\begin{aligned}\chi_{12} &= 1 - \frac{\lambda_1}{2(\lambda_1 + \lambda_2)} \\ \chi_{13} &= 1 - \frac{\lambda_1(\lambda_2 + \lambda_3)^3}{(\lambda_3 + 2\lambda_2)(\lambda_2 + 2\lambda_3)(\lambda_2\lambda_3 + \lambda_1\lambda_3 + \lambda_1\lambda_2)}, \\ \chi_{23} &= 1 - \frac{\lambda_1\lambda_2(\lambda_1 + \lambda_2)^2}{(\lambda_1 + 2\lambda_2)(\lambda_2 + 2\lambda_1)(\lambda_2\lambda_3 + \lambda_1\lambda_3 + \lambda_1\lambda_2)},\end{aligned}$$



$$\chi_{123} = 1 - \frac{\lambda_1}{2(\lambda_1 + \lambda_2)} - \frac{\lambda_1 \lambda_2 (4\lambda_1 \lambda_2 + \lambda_1 \lambda_3 + 3\lambda_2^2 + \lambda_2 \lambda_3)}{3(2\lambda_1 + \lambda_2)(2\lambda_2 + \lambda_3)(\lambda_1 \lambda_2 + \lambda_1 \lambda_3 + \lambda_2 \lambda_3)}.$$

Some properties of the structured components model can be inferred from the expression for  $\chi_{12}$ ; when  $\lambda_1 = \lambda_2$ , then  $\chi_{12} = 0.75$  regardless of the value of the parameter. If  $\lambda_1 \gg \lambda_2$ , then  $\chi_{12} \rightarrow 0.5$ ; if  $\lambda_2 \gg \lambda_1$ , then  $\chi_{12} \rightarrow 1$ . It is natural that this model cannot approach asymptotic independence, since it is based on cumulative sums.

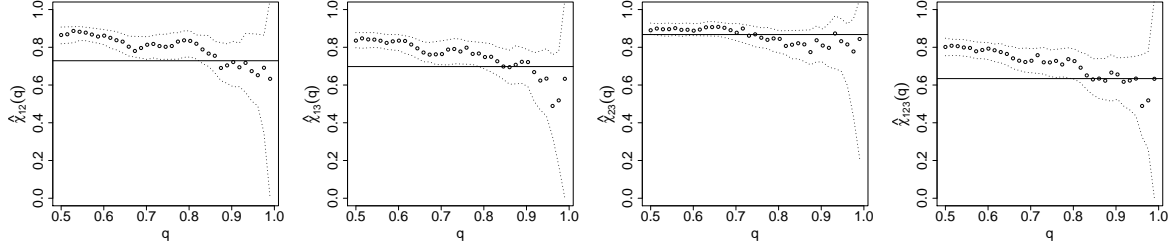

Figure 11: Precipitation data in Abisko: pairwise and trivariate  $\hat{\chi}(q)$  (dots) and model-based limiting  $\chi$  (horizontal lines) for  $u = 24$ , with parameters implied by Table 4 for  $\gamma = \mathbf{0}$ . Approximate 95% pointwise confidence intervals are obtained by bootstrapping from  $\{\mathbf{Y}_i : i = 1, \dots, \mathbf{Y}_n\}$ .

## References

- Rootzén, H., Segers, J., and Wadsworth, J. L. (2018). Multivariate peaks over thresholds models. *Extremes*, 21(1):1–31.
- Wadsworth, J. L. and Tawn, J. A. (2014). Efficient inference for spatial extreme-value processes associated to log-Gaussian random functions. *Biometrika*, 101(1):1–15.
